# Supplementary material for: Clogging transition of many-particle systems flowing through bottlenecks
Source: PubMed Central journal article supplement — Sci Rep. 2014 Dec 4;4:7324. doi: 10.1038/srep07324 (PMC4255180; doi:10.1038/srep07324), 2014-12-04
Supplement: srep07324-s1.pdf [file srep07324-s1.pdf]

**Title: Clogging transition of many-particle systems flowing through bottlenecks**

**Authors:** Iker Zuriguel<sup>1</sup>, Daniel Ricardo Parisi<sup>2,3</sup>, Rúl Cruz Hidalgo<sup>1</sup>, Celia Lozano<sup>1</sup>, Alvaro Janda<sup>4</sup>, Paula Alejandra Gago<sup>3,5</sup>, Juan Pablo Peralta<sup>5</sup>, Luis Miguel Ferrer<sup>6</sup>, Luis Ariel Pagnaloni<sup>3,5</sup>, Eric Clément<sup>7</sup>, Diego Maza<sup>1</sup>, Ignacio Pagonabarraga<sup>8</sup>, Angel Garcimartín<sup>1</sup>.

**Supplementary Information.**

**S1.** Top left: movie taken inside the barn with a green line marking the pixels used to build the spatio-temporal diagram. Top right: movie taken outside the barn. Bottom: spatio-temporal diagram (time increases from left to right).
